# Supplementary material for: Nonlatching positive feedback enables robust bimodality by decoupling expression noise from the mean
Source: PubMed Central journal article supplement (PMC5646755; doi:10.1371/journal.pbio.2000841), 2017-10-18
Supplement: pbio.2000841.s023.pdf [file pbio.2000841.s023.pdf]

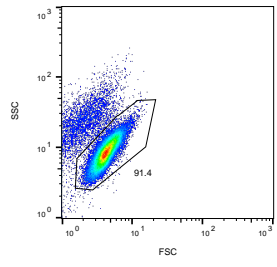

3 iso .5x.FCS  
55543

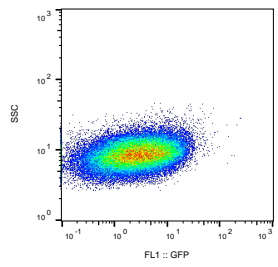

3 iso .5x.FCS  
50784
