# Supplementary material for: Nonlatching positive feedback enables robust bimodality by decoupling expression noise from the mean
Source: PubMed Central journal article supplement (PMC5646755; doi:10.1371/journal.pbio.2000841), 2017-10-18
Supplement: pbio.2000841.s028.pdf [file pbio.2000841.s028.pdf]

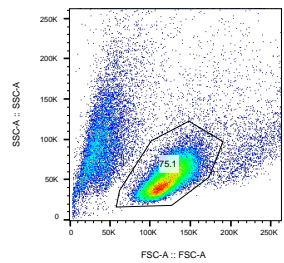

Plate1F2\_BR\_2012-10-13.001.fcs  
54219

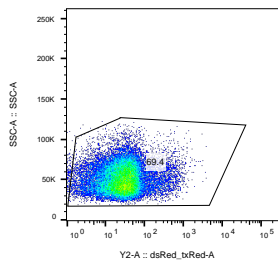

Plate1F2\_BR\_2012-10-13.001.fcs  
40745

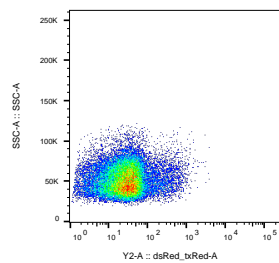

Plate1F2\_BR\_2012-10-13.001.fcs  
28290
