# Supplementary material for: Nonlatching positive feedback enables robust bimodality by decoupling expression noise from the mean
Source: PubMed Central journal article supplement (PMC5646755; doi:10.1371/journal.pbio.2000841), 2017-10-18
Supplement: pbio.2000841.s050.pdf [file pbio.2000841.s050.pdf]

| <i>Reactions</i>                                                                  | <i>Description</i>                                                         | <i>Rate and Value</i>                                                           |
|-----------------------------------------------------------------------------------|----------------------------------------------------------------------------|---------------------------------------------------------------------------------|
| $\text{LTR}_{\text{OFF}} \leftrightarrow \text{LTR}_{\text{ON}}$                  | Promoter toggling from active to inactive state (basal transcription rate) | $k_{\text{ON}} = \text{variable}; k_{\text{OFF}} = \text{variable}$             |
| $\text{LTR}_{\text{ON}} \rightarrow \text{mRNA} + \text{LTR}_{\text{ON}}$         | Transcription of mRNA encoding Tat                                         | $\alpha = 1$                                                                    |
| $\text{mRNA} \rightarrow \text{mRNA} + \text{mCherry}$                            | Translation                                                                | $k_p = 10$                                                                      |
| $*\text{mRNA} \rightarrow \text{mRNA} + \text{Tat}$                               | Translation                                                                | $k_p = 10$                                                                      |
| $\text{Tat} + \text{LTR}_{\text{ON}} \leftrightarrow \text{Tat-LTR}_{\text{ON}}$  | Tat switching between the Tat-dependent and Tat-independent 'ON' state     | $k_{\text{Tatbind}} = \text{variable}$<br>$k_{\text{TatOFF}} = \text{variable}$ |
| $\text{Tat-LTR}_{\text{ON}} \rightarrow \text{Tat-LTR}_{\text{ON}} + \text{mRNA}$ | Transcription from Tat-activated state                                     | $\alpha = 1$                                                                    |
| $\text{mRNA} \rightarrow 0$                                                       | mRNA decay                                                                 | $d_m = .043$                                                                    |
| $\text{Tat} \rightarrow 0$                                                        | Tat decay                                                                  | $d_m = .0024$                                                                   |
| $\text{mCherry} \rightarrow 0$                                                    | mCherry decay                                                              | $d_p = 0.008$                                                                   |
| $**\text{Tat}_{\text{init}}$                                                      | Steady-state Tat input; for open-loop simulations                          | Variable (0-10,000)                                                             |
