# Supplementary material for: Nonlatching positive feedback enables robust bimodality by decoupling expression noise from the mean
Source: PubMed Central journal article supplement (PMC5646755; doi:10.1371/journal.pbio.2000841), 2017-10-18
Supplement: pbio.2000841.s051.pdf [file pbio.2000841.s051.pdf]

| <i>Reactions</i>                                                                       | <i>Description</i>                                                         | <i>Rate and Value</i>                                               |
|----------------------------------------------------------------------------------------|----------------------------------------------------------------------------|---------------------------------------------------------------------|
| $\text{LTR}_{\text{OFF}} \leftrightarrow \text{LTR}_{\text{ON}}$                       | Promoter toggling from active to inactive state (basal transcription rate) | $k_{\text{ON}} = \text{variable}; k_{\text{OFF}} = \text{variable}$ |
| $\text{LTR}_{\text{ON}} \rightarrow \text{mRNA} + \text{LTR}_{\text{ON}}$              | Transcription of mRNA encoding Tat                                         | $\alpha = 1$                                                        |
| $\text{mRNA} \rightarrow \text{mRNA} + \text{mCherry}$                                 | Translation                                                                | $k_p = 10$                                                          |
| $*\text{mRNA} \rightarrow \text{mRNA} + \text{Tat}$                                    | Translation                                                                | $k_p = 10$                                                          |
| $\text{Tat} + \text{LTR}_{\text{OFF}} \rightarrow \text{Tat} + \text{LTR}_{\text{ON}}$ | Tat switching the LTR to 'ON' state                                        | $k_{\text{TatON}} = \text{variable}$                                |
| $\text{mRNA} \rightarrow 0$                                                            | mRNA decay                                                                 | $d_m = .043$                                                        |
| $\text{Tat} \rightarrow 0$                                                             | Tat decay                                                                  | $d_m = .0024$                                                       |
| $\text{mCherry} \rightarrow 0$                                                         | mCherry decay                                                              | $d_p = 0.008$                                                       |
| $**\text{Tat}_{\text{init}}$                                                           | Steady-state Tat input; for open-loop simulations                          | Variable (0-10,000)                                                 |
