# Supplementary material for: Nonlatching positive feedback enables robust bimodality by decoupling expression noise from the mean
Source: PubMed Central journal article supplement (PMC5646755; doi:10.1371/journal.pbio.2000841), 2017-10-18
Supplement: pbio.2000841.s052.pdf [file pbio.2000841.s052.pdf]

| <i>Reactions</i>                                                                                    | <i>Description</i>                                                         | <i>Rate and Value</i>                                   |
|-----------------------------------------------------------------------------------------------------|----------------------------------------------------------------------------|---------------------------------------------------------|
| $\text{LTR}_{\text{OFF}} \leftrightarrow \text{LTR}_{\text{ON}}$                                    | Promoter toggling from active to inactive state (basal transcription rate) | $k_{\text{ON}}$ = variable; $k_{\text{off}}$ = variable |
| $\text{LTR}_{\text{ON}} \rightarrow \text{mRNA} + \text{LTR}_{\text{ON}}$                           | Transcription of mRNA encoding Tat                                         | $\alpha = 1$                                            |
| $\text{mRNA} \rightarrow \text{mRNA} + \text{mCherry}$                                              | Translation                                                                | $k_p = 10$                                              |
| $*\text{mRNA} \rightarrow \text{mRNA} + \text{Tat}$                                                 | Translation                                                                | $k_p = 10$                                              |
| $\text{Tat} + \text{LTR}_{\text{ON}} \rightarrow \text{LTR}_{\text{ON}} + \text{mRNA} + \text{Tat}$ | Tat induction of transcription                                             | $\alpha_{\text{Tat}}$ = variable                        |
| $\text{mRNA} \rightarrow 0$                                                                         | mRNA decay                                                                 | $d_m = .043$                                            |
| $\text{Tat} \rightarrow 0$                                                                          | Tat decay                                                                  | $d_m = .0024$                                           |
| $\text{mCherry} \rightarrow 0$                                                                      | mCherry decay                                                              | $d_p = 0.008$                                           |
| **Tat <sub>init</sub>                                                                               | Steady-state Tat input; for open-loop simulations                          | Variable (0-10,000)                                     |
